# Supplementary material for: Performance enhancement of high temperature SnO2-based planar perovskite solar cells: electrical characterization and understanding of the mechanism
Source: Royal Society of Chemistry journal article supplement (doi:10.1039/c6ta01839d), 2016-01-01
Supplement: c6ta01839d1.pdf [file c6ta01839d1.pdf]

## Supporting Information

### Performance enhancement of high temperature SnO<sub>2</sub>-based planar perovskite solar cells: electrical characterization and mechanism understanding

Liangbin Xiong,<sup>ab</sup> Mingchao Qin,<sup>a</sup> Guang Yang,<sup>a</sup> Yaxiong Guo,<sup>a</sup> Hongwei Lei,<sup>a</sup> Qin Liu,<sup>a</sup> Weijun Ke,<sup>a</sup> Hong Tao,<sup>a</sup> Pingli Qin,<sup>a</sup> Songzhan Li,<sup>a</sup> Huaqing Yu<sup>b</sup> and Guojia Fang<sup>a\*</sup>

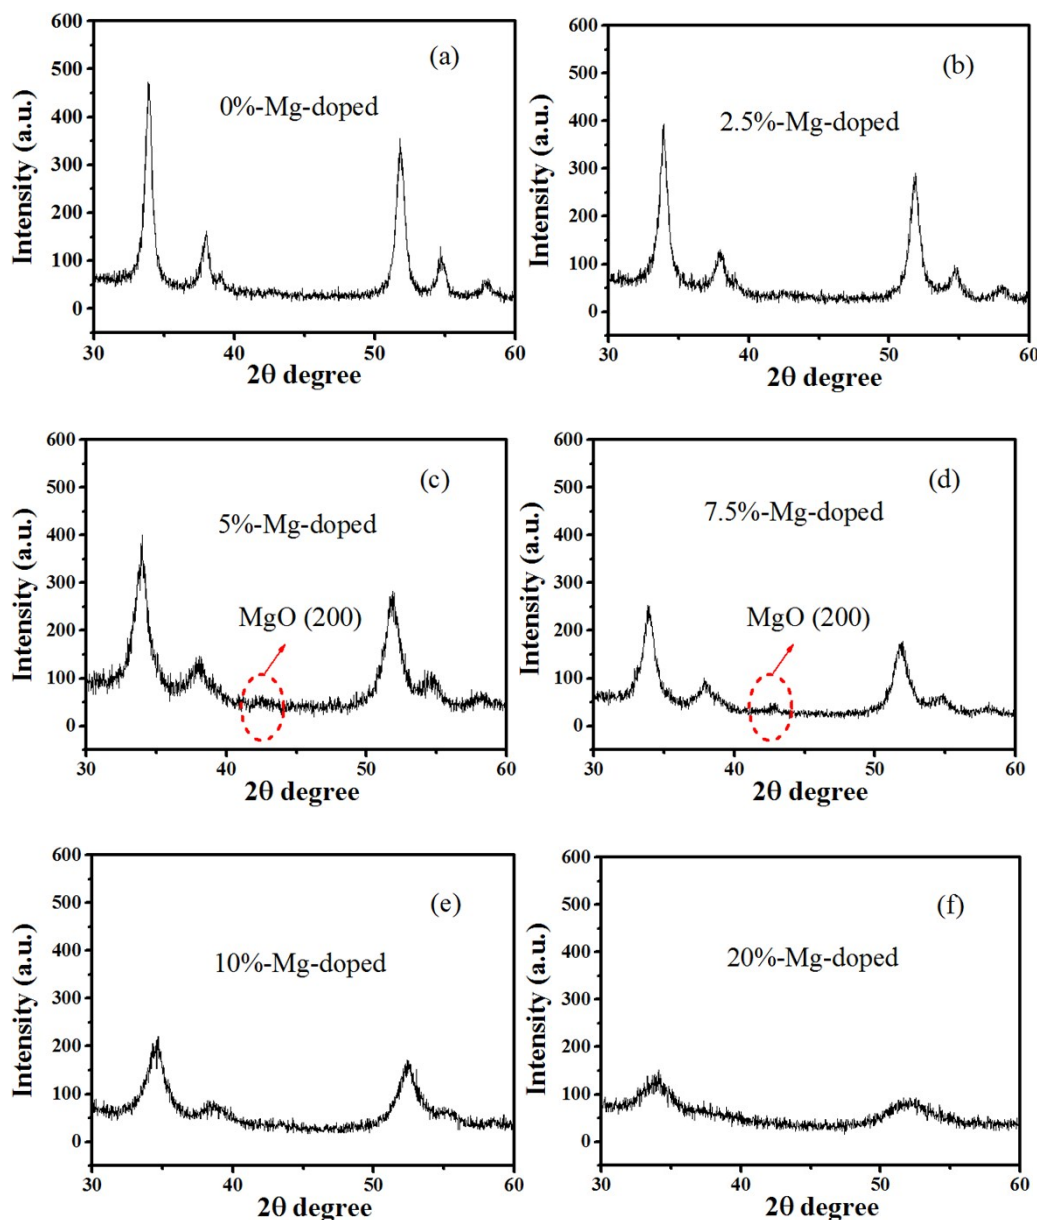

Figure S1 XRD patterns of 0% (a), 2.5% (b), 5% (c), 7.5% (d), 10% (e) and 20% (f) Mg-doped SnO<sub>2</sub>. (200) plane of MgO appeared in Figure S1c and Figure S1d.

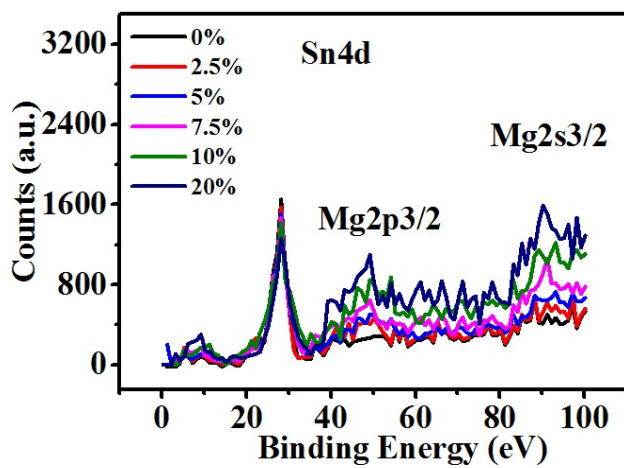

Figure S2 Lower energy portion of the XPS spectra for 0, 2.5, 5, 7.5, 10 and 20% SnO<sub>2</sub>.

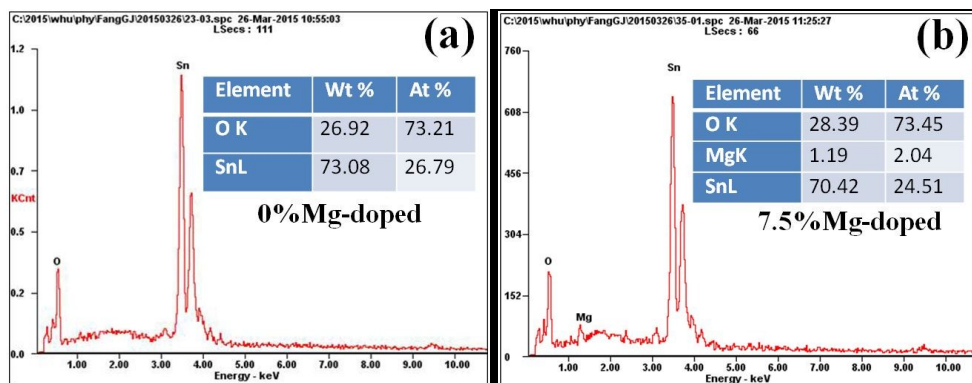

Figure S3 EDX analysis of (a) undoped and (b) 7.5% SnO<sub>2</sub> films. EDX analysis of undoped SnO<sub>2</sub> indicating non-stoichiometric behavior of the film. EDX analysis of 7.5 % SnO<sub>2</sub> film shows that the sample contains 24.51 At% of Sn and 2.04 At % of Mg, thus indicating the presence of nearly 7.5% Mg in Mg-doped SnO<sub>2</sub> film.

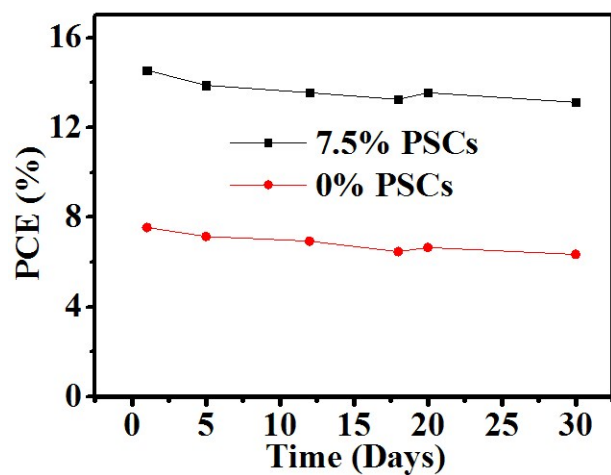

Figure S4 Power conversion efficiency as a function of time for unencapsulated 7.5% and 0% devices with their highest PCEs.

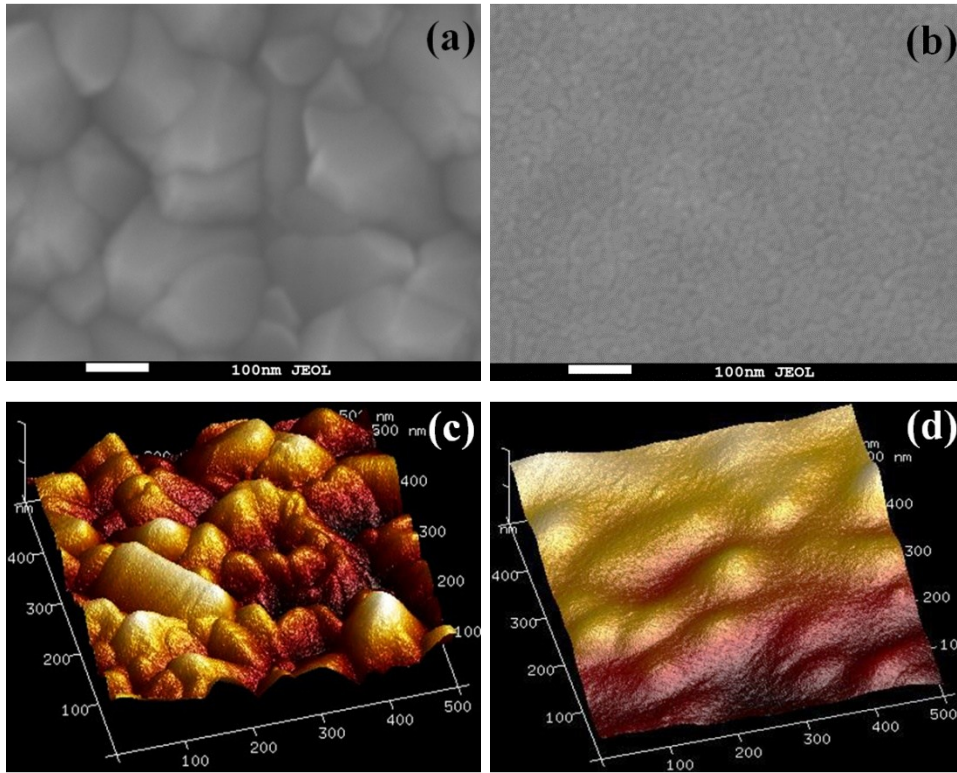

Figure S5 SEM images of (a) bare FTO, (b) 7.5% SnO<sub>2</sub> film on FTO substrate, AFM images of (c) bare FTO and (d) 7.5% SnO<sub>2</sub> film.

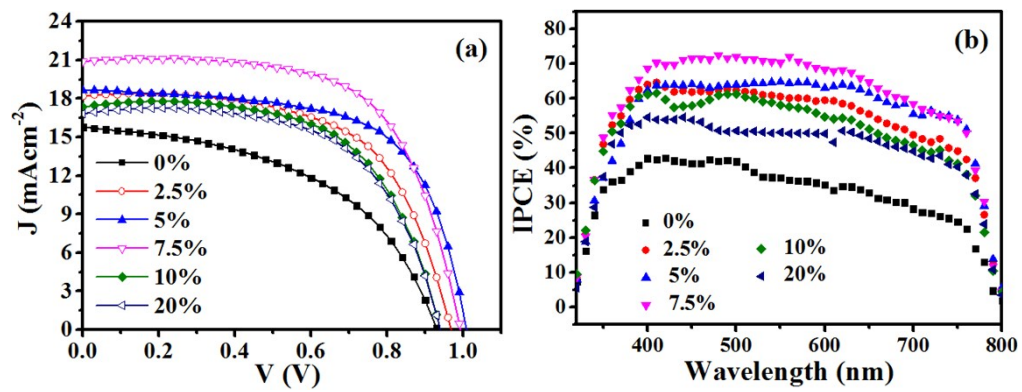

Figure S6 (a) J-V curves of devices with different Mg content, (b) IPCE spectra of devices based on the corresponding films.

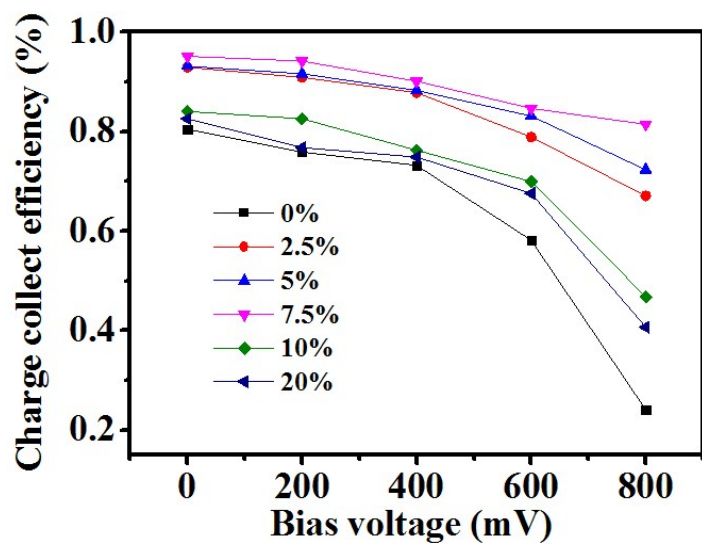

Figure S7 Charge collection efficiency calculated from the  $R_{tr}$  and  $R_{rec}$  of  $\text{SnO}_2$ -based PSCs under a full simulated irradiation.

Table S1  $V_{OC}$ ,  $J_{SC}$ , FF, PCE of devices using 0 and 7.5% PSCs with their highest PCEs.

| Samples      | $V_{OC}$ (V) | $J_{SC}$ (mAcm <sup>-2</sup> ) | FF (%) | PCE (%) |
|--------------|--------------|--------------------------------|--------|---------|
| 7.5% reverse | 1.003        | 21.44                          | 0.708  | 15.24%  |
| 7.5% forward | 0.985        | 20.98                          | 0.655  | 13.54%  |
| 0% reverse   | 0.944        | 17.39                          | 0.500  | 8.208%  |
| 0% forward   | 0.825        | 16.64                          | 0.465  | 6.384%  |



Table S2  $V_{OC}$ ,  $J_{SC}$ , FF, PCE of devices with different amounts of Mg-doped  $\text{SnO}_2$  films.

|          | 0%   | 2.5% | 5%   | 7.5% | 10%  | 20%  |
|----------|------|------|------|------|------|------|
| $V_{OC}$ | 0.93 | 0.96 | 1.01 | 0.99 | 0.95 | 0.95 |
| $J_{SC}$ | 15.7 | 18.2 | 18.6 | 20.9 | 17.3 | 16.8 |
| FF       | 0.47 | 0.6  | 0.61 | 0.65 | 0.56 | 0.51 |
| PCE      | 7.03 | 10.9 | 12.1 | 13.5 | 10.3 | 9.94 |
